# Supplementary material for: Effect of fuel dosage in self-propagation combustion: evolution of BiOCl to BiOCl/Bi24O31Cl10 heterojunctions enriched with oxygen vacancies
Source: Royal Society of Chemistry journal article supplement (doi:10.1039/d4nj02709d), 2024-01-01
Supplement: d4nj02709d1.pdf [file d4nj02709d1.pdf]

# **Supplementary Material (ESI) for New Journal of Chemistry**

## **Effect of fuel dosage in self-propagation combustion: Evolution of BiOCl to BiOCl/Bi<sub>24</sub>O<sub>31</sub>Cl<sub>10</sub> heterojunction enriched with oxygen vacancies**

Han Liu, Wenjun Zhang, Meng Chen\*

Department of Materials Science, Fudan University, Shanghai, 200433, PR China

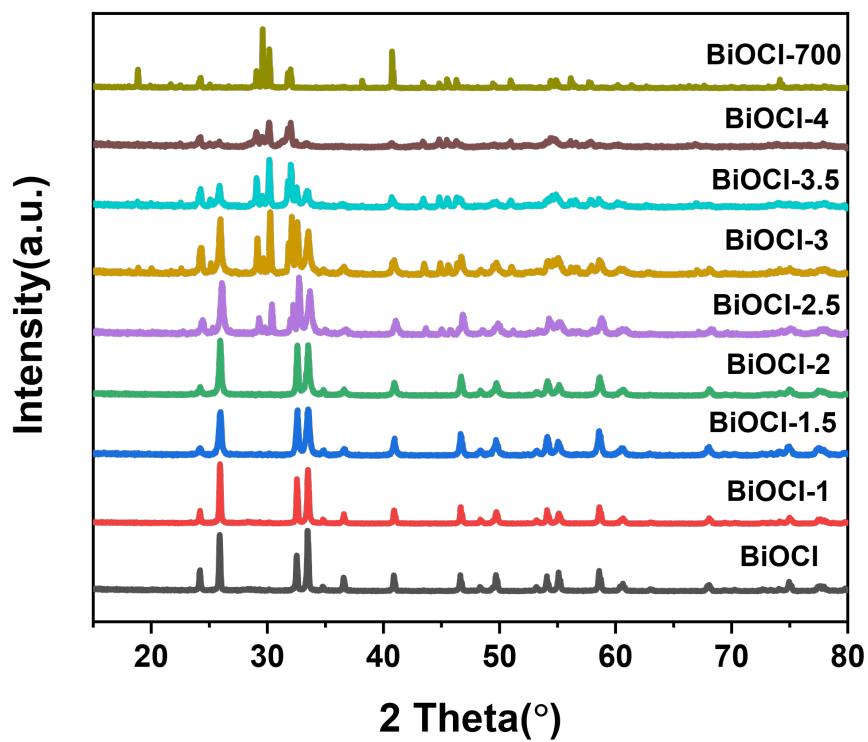

Fig S1. XRD patterns prepared with different glycine dosages

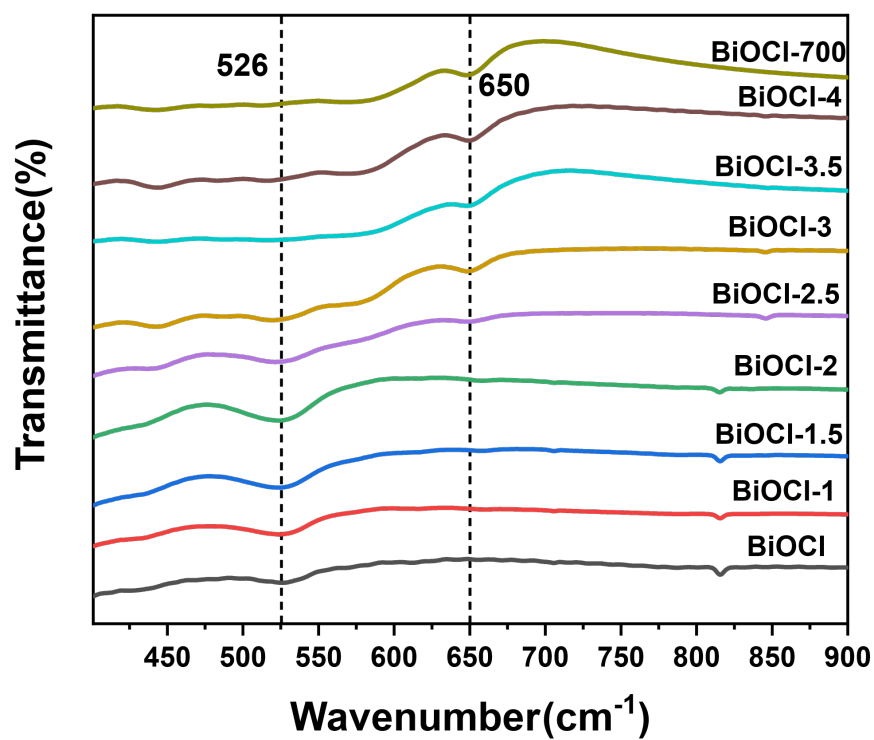

Fig S2. FTIR spectra of the samples prepared with different glycine dosages

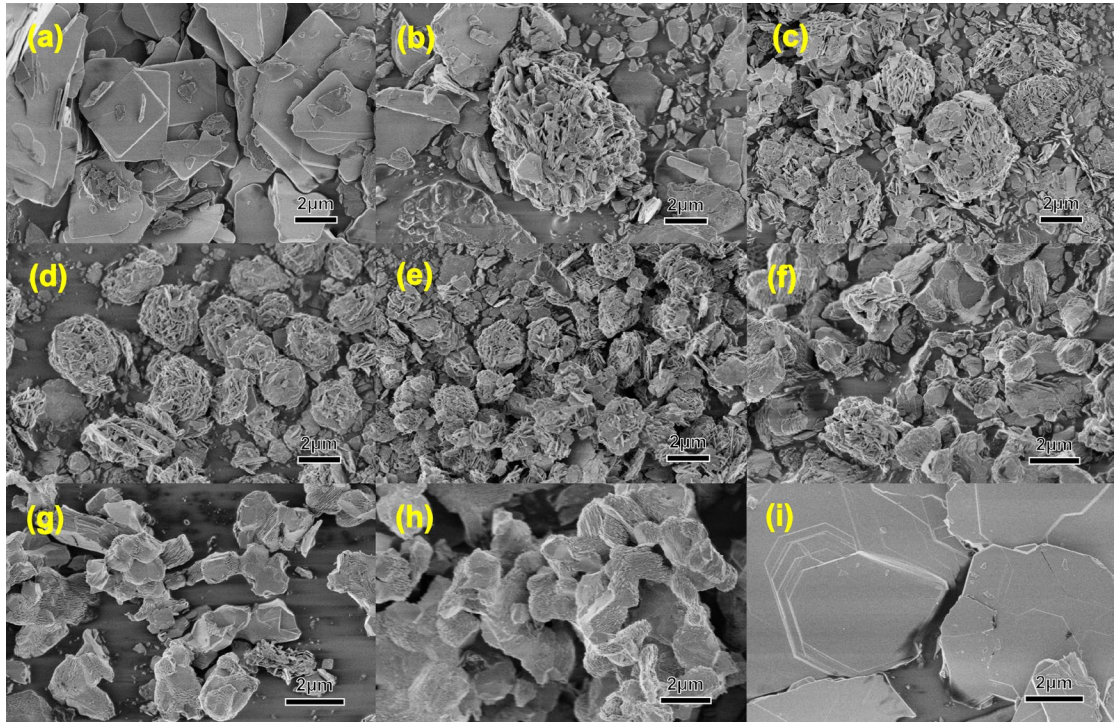

Fig S3. SEM images of the samples prepared with different glycine dosages (a) BiOCl, (b) BiOCl-1, (c) BiOCl-1.5, (d) BiOCl-2, (e) BiOCl-2.5, (f) BiOCl-3, (g) BiOCl-3.5, (h) BiOCl-4, and (i) BiOCl-700

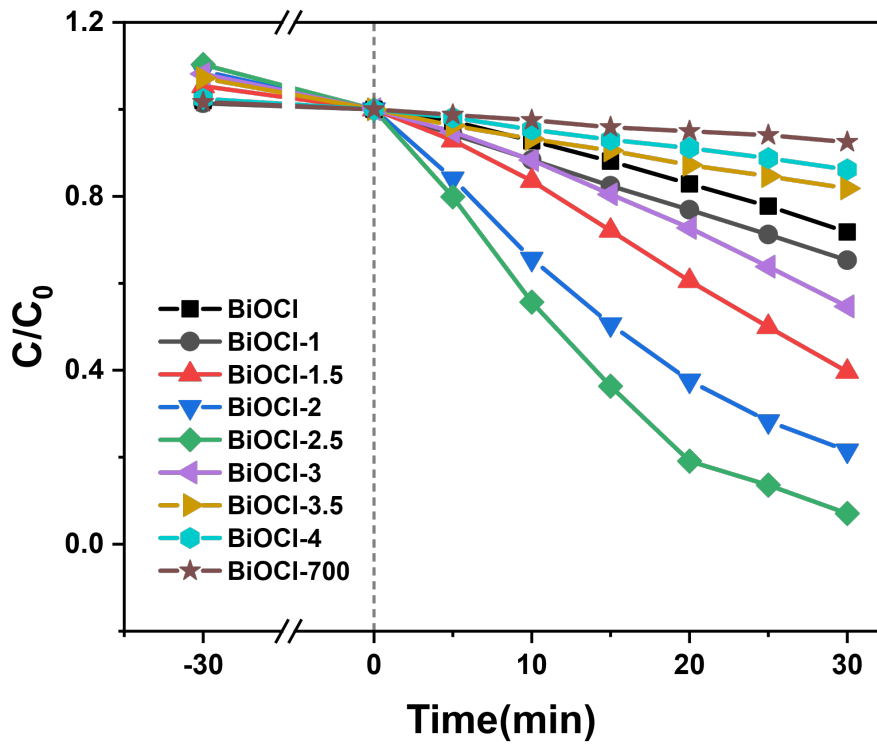

Fig S4. Photocatalytic degradation efficiency curves of RhB by the samples prepared with different glycine dosages

S1 Table First-order kinetic constant of as-prepared samples

|                     | BiOCl  | BiOCl-1 | BiOCl-1.5 | BiOCl-2 | <b>BiOCl-2.5</b> | BiOCl-3 | BiOCl-3.5 | BiOCl-4 | BiOCl-700 |
|---------------------|--------|---------|-----------|---------|------------------|---------|-----------|---------|-----------|
| K/min <sup>-1</sup> | 0.0111 | 0.0141  | 0.0310    | 0.0525  | <b>0.0898</b>    | 0.0199  | 0.0066    | 0.0050  | 0.0026    |
| R square            | 0.982  | 0.997   | 0.972     | 0.995   | <b>0.982</b>     | 0.972   | 0.999     | 0.997   | 0.995     |

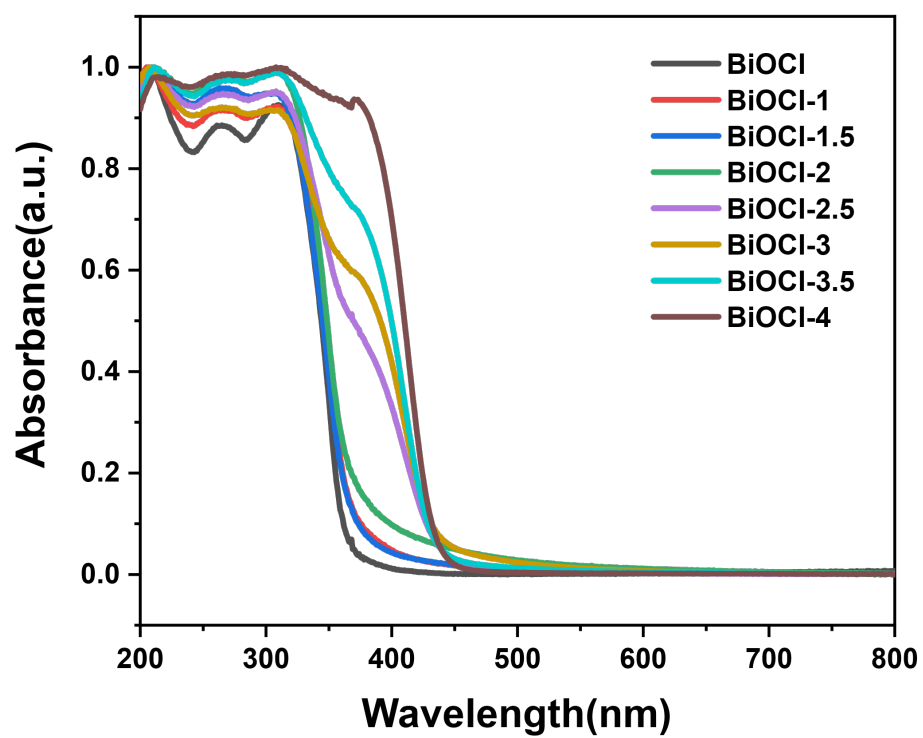

Fig S5. The UV-vis diffuse reflectance spectra of the samples prepared with different glycine dosages
